# Supplementary material for: The Helicobacter pylori Genome Project: insights into H. pylori population structure from analysis of a worldwide collection of complete genomes
Source: PubMed Central journal article supplement (PMC10713588; doi:10.1038/s41467-023-43562-y), 2023-12-11
Supplement: 41467_2023_43562_MOESM3_ESM.pdf [file 41467_2023_43562_MOESM3_ESM.pdf]

## **Description of Additional Supplementary Files:**

**Supplementary Data 1:** Details of the 1,012 genomes sequenced within HpGP, and their genome statistics

**Supplementary Data 2:** Details of the 255 representative genomes included for population structure reference.

**Supplementary Data 3:** Detailed geographical origin and subpopulation assignments of the entire HpGP set.

**Supplementary Data 4:** Table of public US genomes included in the in-depth analysis of the highly clonal US cluster.
